# Supplementary material for: Pre‐ and post‐docking sampling of conformational changes using ClustENM and HADDOCK for protein‐protein and protein‐DNA systems
Source: PubMed Central journal article supplement — Proteins. 2019 Sep 3;88(2):292–306. doi: 10.1002/prot.25802 (PMC6973081; doi:10.1002/prot.25802), 2019-09-03

## Supplementary Information

### **Sampling Conformational Changes Prior and After Complexation Using ClustENM and HADDOCK for protein-protein and protein-DNA systems**

Zeynep Kurkcuoglu<sup>1</sup> and A. M. J. J. Bonvin<sup>1</sup>

<sup>1</sup>Bijvoet Center for Biomolecular Research, Faculty of Science - Chemistry, Utrecht University, Padualaan 8, 3584CH Utrecht, The Netherlands

E-mail: [zeynepkurkcuoglu@gmail.com](mailto:zeynepkurkcuoglu@gmail.com) (ZK), [a.m.j.j.bonvin@uu.nl](mailto:a.m.j.j.bonvin@uu.nl) (AMJJB)

## Docking settings

**Table S1.** Flexible multidomain docking benchmark settings

| <b>PDB</b> | <b>Receptor active residues</b>                                                                                                                                                             | <b>Ligand active residues</b>                                                                                                                    |
|------------|---------------------------------------------------------------------------------------------------------------------------------------------------------------------------------------------|--------------------------------------------------------------------------------------------------------------------------------------------------|
| 1IRA       | 12- 15, 30, 31, 112, 114-116, 120, 121, 127, 129, 201- 203, 205, 236, 238, 240, 270, 271, 298-303                                                                                           | 39, 40 ,42, 43, 50-54, 56, 102, 107, 126-130, 147, 149, 150, 151                                                                                 |
| 1H1V       | 428, 429, 465, 467, 473, 474, 476, 477, 478, 480-482, 484, 485, 487, 488, 491-498, 646-651, 654-656, 658, 669                                                                               | 425, 533, 543-548, 567-569, 621, 692, 696, 711, 714, 715, 718, 726-728, 734, 741, 742, 745, 746, 748, 749                                        |
| 1Y64       | 1359, 1360, 1362, 1402-1409, 1411, 1412, 1414, 1415, 1424, 1427, 1428, 1430-1432, 1434, 1437, 1460, 1463, 1508, 1632, 1639, 1641                                                            | 4-6, 99, 100, 102, 124, 125, 128, 130, 143-148, 167, 225, 318, 319, 321-324, 328, 341, 345, 346, 348-354, 359, 360, 362-365, 366, 367            |
| 1F6M       | 37, 39, 44, 81-83, 85, 99, 100, 128-131, 133, 137-139, 141-143, 215-217, 237, 238                                                                                                           | 31-35, 37, 40, 41, 44, 60, 67, 70-75, 77, 91, 93-98                                                                                              |
| 1FAK       | 275-278, 304-309, 312, 325, 379, 382, 1062-1065, 1069-1074, 1076-1082, 1085, 1088, 1090, 1092-1094                                                                                          | 17, 18, 20, 22, 24, 37, 39-48, 50, 51, 56, 58, 61, 74, 76, 90-96, 109, 110, 112, 130-133, 135, 140, 203                                          |
| 1ZLI       | 1, 4-12, 15, 26-29, 34, 35, 37, 41-46, 48, 49, 52-55, 57, 72-74                                                                                                                             | 14, 69, 71-73, 119-125, 127, 145, 154-157, 161-164, 196-199, 201, 210, 244-249, 270, 276, 277, 279, 280, 283                                     |
| 1E4K       | 235-239, 326-330, 332, 1234-1239, 1265-1267, 1269, 1298, 1299, 1327                                                                                                                         | 85-87, 110, 113, 114, 116, 117, 119, 126-129, 131, 132, 152, 155-158                                                                             |
| 1IBR       | 10-13, 15, 18, 22, 25, 51, 52, 55, 56, 59, 60, 62, 63, 67-69, 72, 105-107, 111, 156, 159, 160, 199, 232, 235, 239, 242, 246, 274, 277, 278, 281, 284, 285, 288, 336, 338, 340-342, 350, 354 | 12, 45-47, 64, 70, 74-79, 81, 82, 103, 104, 106, 107, 109-114, 137, 139-147, 156, 159, 162, 163, 166, 172, 173                                   |
| 1KKL       | 136-138, 140, 157, 178-180, 182, 198, 199, 204, 210, 1297, 1298, 1301, 1302, 1304, 1305, 1308-1310                                                                                          | 11-16, 32, 37, 40-43, 45-49, 51-57                                                                                                               |
| 1NPE       | 37-39, 42-47, 73-79, 82, 89-91                                                                                                                                                              | 921, 944, 946-949, 951, 967, 968, 992, 994, 1010, 1011, 1035, 1037, 1053, 1055, 1080, 1082, 1098, 1122, 1124, 1138, 1160, 1161, 1163, 1164, 1166 |
| 1DFJ       | 6, 7, 31, 32, 60, 89, 117, 146, 202, 228, 257, 259, 283, 285, 314, 316, 342, 379, 397, 399, 401, 402, 404-408, 426, 428, 430, 431, 432-436, 453, 455, 456                                   | 4, 7, 11, 12, 23, 24, 28, 31, 32, 35, 38-44, 65-67, 69, 71, 86,88-91, 109-111, 118-120                                                           |

**Table S2.** Protein-DNA docking settings

| <b>PDB</b> | <b>Protein ambiguous interaction restraints</b>                                                                        | <b>DNA ambiguous interaction restraints</b> |
|------------|------------------------------------------------------------------------------------------------------------------------|---------------------------------------------|
| 1BY4       | Act: 31, 32 -> 5, 6, 25, 26<br>24, 27 -> 3, 4, 27, 28<br>72, 73, 80 -> 2-4<br>Pas: 34, 75, 76, 77, 55, 56, 59, 62      | Act: 2, 3,4, 5, 6, 23-29                    |
| 3CRO       | Act: 29, 31, 32, 35, 42-44 -> 14, 15, 23, 33<br>Pas: 9, 18-20, 27, 28, 30, 34, 36, 37, 40 ,41, 45, 46                  | 4-7, 13-18, 22-25, 31-34, 36                |
| 1AZP       | Act: 24 -> 3, 15<br>26, 29, 31, 45 -> 2-4, 13-15<br>22, 33, 42 -> 5-7, 10-12<br>Pas: 21, 25, 27, 28 39, 40, 44, 46, 47 | 2-7, 10-15                                  |
| 1JJ4       | Act: 13, 16, 17, 19-21<br>Pas: 34, 35, 37 -> 26, 27                                                                    | 3-5, 25-30                                  |
| 1A74       | Act: 97,122 -> 35, 36<br>54-56, 59, 60, 65, 73, 75 -> 1-7<br>Pas: 51, 57, 58, 66, 71, 77, 100, 119                     | 1-7, 35, 36, 40                             |
| 1ZME       | Act: 9, 11, 12, 80, 82, 83<br>Pas: 4, 14, 39-43, 75, 85, 100-114                                                       | 2-4, 9-15, 17, 18, 20-22, 26-35             |

## Supplementary Figures

**Figure S1.** i-RMSD distributions of the generated complex structures from start (docking models, “gen0”) to the final CustENM models (“gen2”). We used two starting models obtained from docking (top 2 best scoring clusters from HADDOCK, named as “gen0”) and applied post-docking ClustENM for two generations to simulate induced-fit conformational changes. Yellow and green dots distinguish the conformations originating from the two starting docked models. The grey area highlights i-RMSD values below 4 Å. The i-RMSD changes due to ClustENM sampling is more visible in the case of 1Y64, 1F6M, 1FAK and 1E4K, but not so pronounced in the remaining cases. The quality of the starting models is the determining factor for the quality of the complexes after ClustENM sampling.

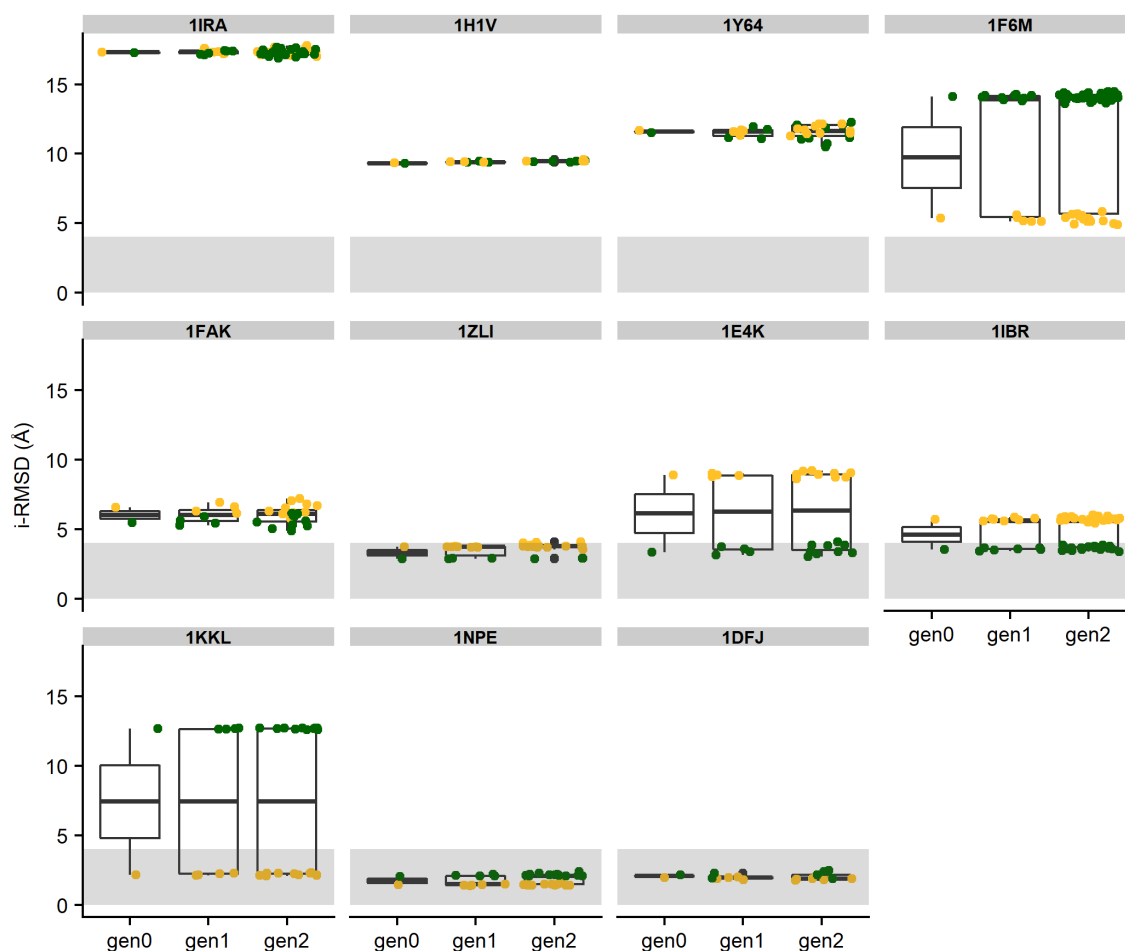

**Figure S2.** L-RMSD distributions of the generated complex structures of protein-protein systems from start (docking models, “gen0”) to the final ClustENM models (“gen2”). The remaining dots in “gen1” and “gen2” are colored based on their “descendance” (i.e. green dots are the children of green dot in “gen0” and the same for yellow). The grey area is where I-RMSD is less than 10 Å. As expected, the change in I-RMSD is more visible compared to i-RMSD, illustrated in cases of 1Y64, 1F6M, 1FAK, 1ZLI, 1E4K, 1IBR, 1KKL and 1NPE.

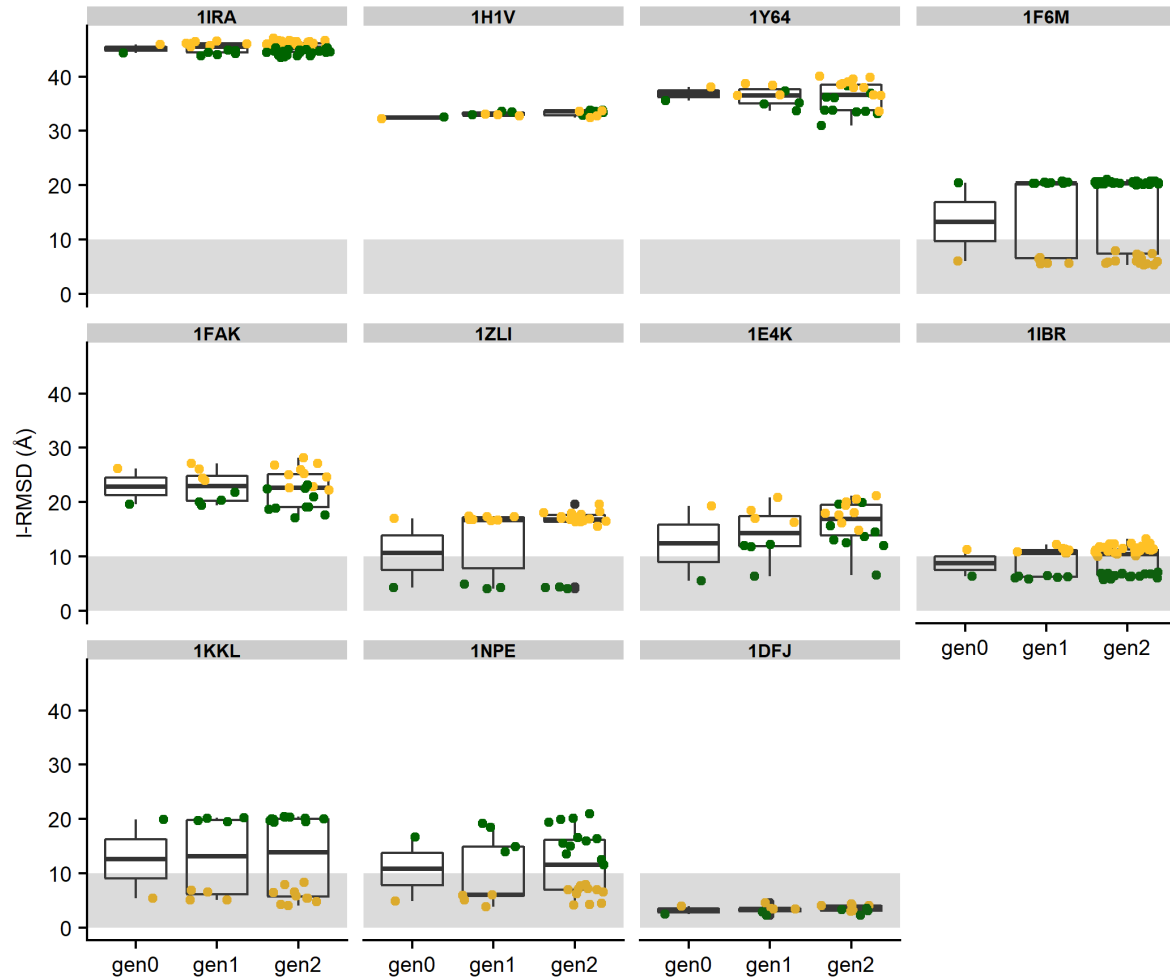

**Figure S3.** fnat of generated structured from start (“gen0”) to final (“gen2”) for protein-protein systems. Similar to i-RMSD and l-RMSD figures, two starting complex structures obtained from docking are denoted as “gen0” and shown as yellow and green dots. The remaining dots in “gen1” and “gen2” are colored based on their descendance. Grey colored area is where fnat is more than 0.1. The change in fnat is pronounced in cases of 1F6M, 1FAK, 1ZLI, 1E4K, 1IBR, 1KKL, 1NPE and 1DFJ.

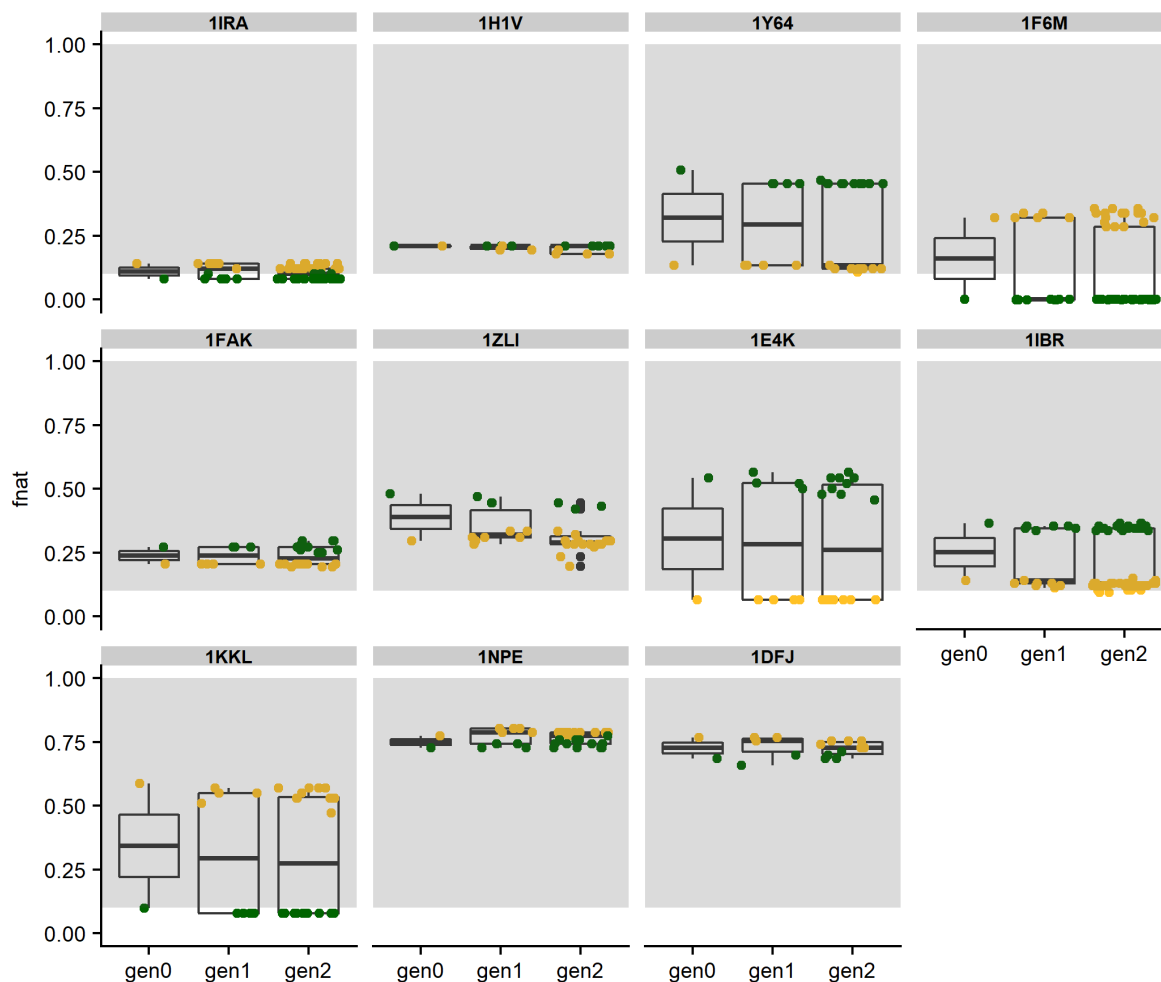

**Figure S4.** i-RMSD distributions of generated models from start (“gen0”) to final (“gen2”). Green and yellow dots in “gen0” are the starting complex structures obtained from the docking. Remaining dots in “gen1” and “gen2” are colored based on their “descendance”. The grey area highlights the region with i-RMSD less than 4 Å. The change in i-RMSD in protein-DNA complexes due to post-docking sampling is visible in all cases. The sampled structures show deviations resulting in both smaller and larger changes in i-RMSD. We can see that the post-docking ClustENM sampling does improve the quality of the complexes, thereby mimicking induced-fit effects.

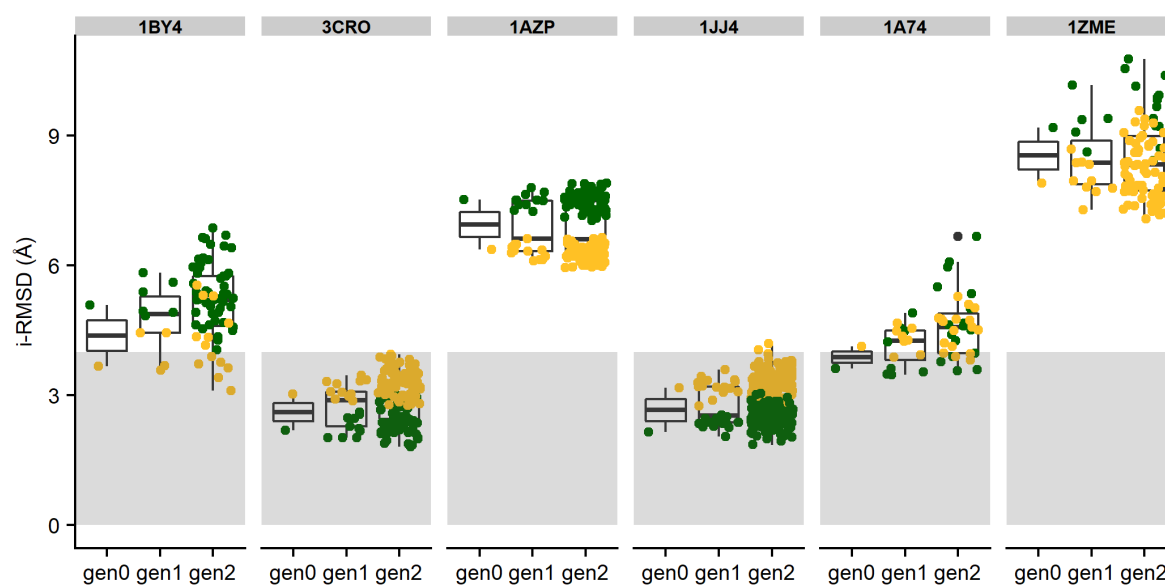

**Figure S5.** I-RMSD of generated structured from start (“gen0”) to final (“gen2”) for protein-DNA systems. Green and yellow dots in “gen0” are the starting complex structures obtained from docking and the remaining dots are colored based on their descendance. Like in the i-RMSD figure for protein-DNA cases, the change in I-RMSD is clear in all cases. Especially in 1ZME case, some of sampled conformers in gen2 have favorable I-RMSD thanks to post-sampling (grey region where I-RMSD < 10 Å).

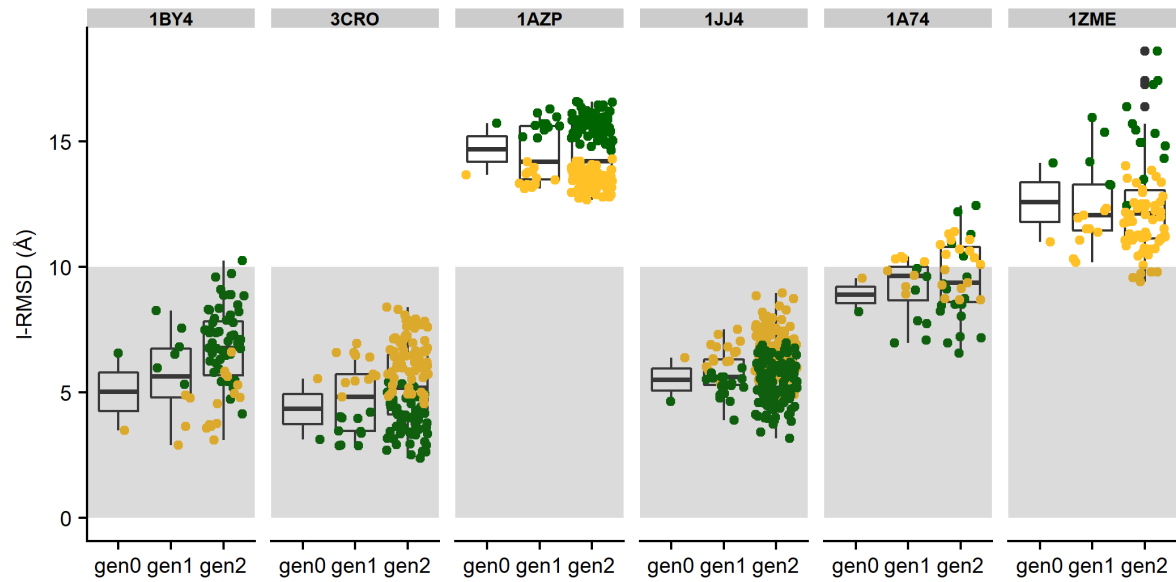



**Figure S6.** fnat of generated structured from start (“gen0”) to final (“gen2”) for protein-DNA systems. The color code is the same as i-RMSD and I-RMSD figures; green and yellow dots in “gen0” are the starting complex structures obtained from docking and the remaining dots are colored based on their descentance. The change in fnat for protein-DNA cases is also visible in all cases, in both favorable and unfavorable directions.

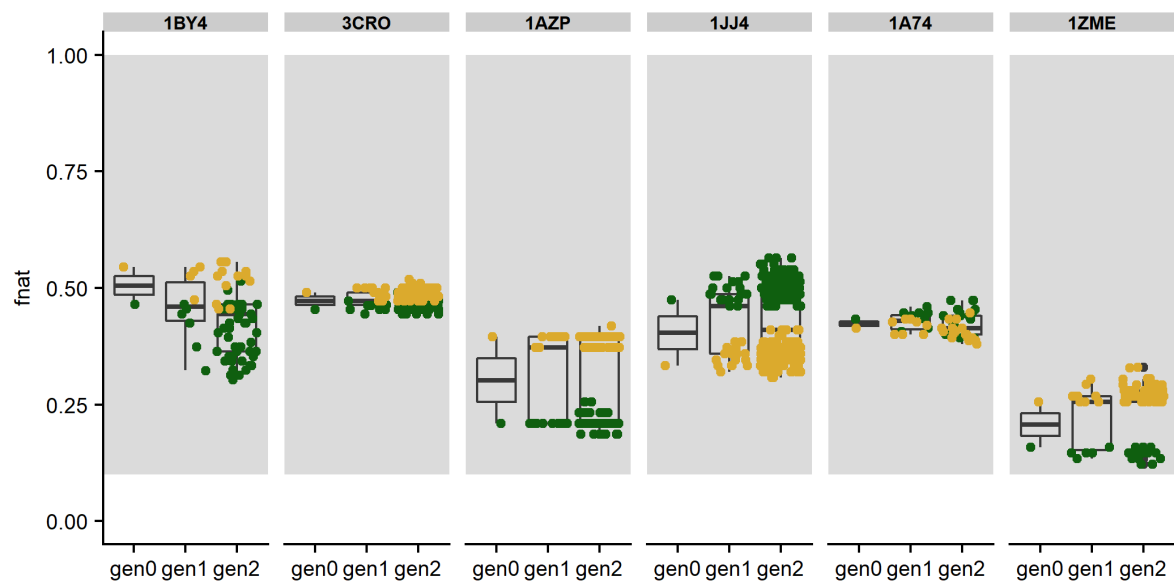

Supplement: PROT-88-292-s001.pdf [file PROT-88-292-s001.pdf]
